## Implication of anti-angiogenic VEGF-A165b in angiogenesis and systolic function after reperfused myocardial infarction

V. Marcos Garces<sup>1</sup>, C. Rios-Navarro<sup>2</sup>, L. Hueso<sup>2</sup>, A. Diaz<sup>3</sup>, C. Bonanad<sup>1</sup>, A. Ruiz-Sauri<sup>4</sup>, M.J. Sanz<sup>5</sup>, F.J. Chorro<sup>1</sup>, L. Piqueras<sup>5</sup>, V. Bodi<sup>1</sup>

<sup>1</sup>University Hospital Clinica of Valencia, Department of Cardiology, Valencia, Spain; <sup>2</sup>Instituto de Investigacion Sanitaria INCLIVA, Valencia, Spain;

<sup>3</sup>University of Valencia, Central Unit for Research in Medicine (UCIM), Valencia, Spain; <sup>4</sup>University of Valencia, Department of Pathology, Valencia, Spain; <sup>5</sup>University of Valencia, Department of Pharmacology, Valencia, Spain

**Funding Acknowledgement:** Type of funding source: Public grant(s) – National budget only. Main funding source(s): This study was funded by “Instituto de Salud Carlos III” and “Fondos Europeos de Desarrollo Regional FEDER” (Exp. PIE15/00013, PI17/01836, PI18/00209 and CIBERCIV16/11/00486).

**Background:** Angiogenesis participates in re-establishing microcirculation after myocardial infarction (MI).

**Purpose:** In this study, we aim to further understand the role of the anti-angiogenic isoform vascular endothelial growth factor (VEGF)-A165b after MI and explore its potential as a co-adjuvant therapy to coronary reperfusion.

**Methods:** Two mice MI models were formed: 1) permanent coronary ligation (non-reperfused MI), 2) transient 45-min coronary occlusion followed by reperfusion (reperfused MI); in both models, animals underwent echocardiography before euthanasia at day 21 after MI induction. Serum and myocardial VEGF-A165b levels were determined. In both experimental MI models, functional and structural implication of VEGF-A165b blockade was assessed. In a cohort of 104 ST-segment elevation MI patients, circulating VEGF-A165b levels were correlated with cardiovascular magnetic resonance-derived left ventricular ejection fraction at 6-months and with the occurrence of adverse events (death, heart failure and/or re-infarction).

**Results:** In both models, circulating and myocardial VEGF-A165b presence was increased 21 days after MI induction. Serum VEGF-A165b levels inversely correlated with systolic function evaluated by echocardiography. VEGF-A165b blockage increased capillary density, reduced infarct size, and enhanced left ventricular function in reperfused, but not in non-reperfused MI experiments. In patients, higher VEGF-A165b levels correlated with depressed ejection fraction and worse outcomes.

**Conclusions:** In experimental and clinical studies, higher serum VEGF-A165b levels associates with a worse systolic function. Its blockage enhances neoangiogenesis, reduces infarct size, and increases ejection fraction in reperfused, but not in non-reperfused MI experiments. Therefore, VEGF-A165b neutralization represents a potential co-adjuvant therapy to coronary reperfusion.
